# Supplementary material for: Solid-Phase Synthesis of the Bicyclic Peptide OL-CTOP Containing Two Disulfide Bridges, and an Assessment of Its In Vivo μ-Opioid Receptor Antagonism after Nasal Administration
Source: MDPI journal article supplement (doi:10.3390/molecules28041822), 2023-02-15
Supplement: s1 [file s1]

## **Solid-phase synthesis of a bicyclic peptide OL-CTOP containing two disulfide bridges and assessment of its *in vivo* $\mu$ -opioid receptor antagonism after nasal administration**

**Ramanjaneyulu Rayala<sup>1†</sup>, Annika Tiller<sup>1</sup>, Shahayra A. Majumder<sup>2</sup>, Heather M. Stacy<sup>2</sup>, Shainnel O. Eans<sup>2</sup>, Aleksandra Nedovic<sup>1</sup>, Jay P. McLaughlin<sup>2\*</sup> and Predrag Cudic<sup>1\*</sup>**

<sup>1</sup>Department of Chemistry and Biochemistry, Charles E. Schmidt College of Science, Florida Atlantic University, 777 Glades Road, Boca Raton, FL 33431, USA

<sup>2</sup>Department of Pharmacodynamics, School of Pharmacy, University of Florida, 1345 Center Drive, Gainesville, FL 32610, USA

<sup>†</sup> Current address: Center for Translational Science, Florida International University, 11350 SW Village Parkway Port St. Lucie, FL 34987, USA

\*Correspondence: jmclaughlin@cop.ufl.edu; +1-352-273-7207 (J.P.M.); pcudic@fau.edu; +1-561-799-8375 (P.C.)

RP-HPLC analysis: C18 monomeric column (Grace Vydac, 250 × 4.6 mm, 5 mm, 120 Å), 1 ml/min flow rate, and elution method with a linear gradient of 2 → 100% B over 45 min, where A is 0.1% TFA in H<sub>2</sub>O, and B is 0.08% TFA in CH<sub>3</sub>CN. Because of limited solubility in water, all peptides were dissolved in DMSO and DMSO solutions were used for RP-HPLC analysis.

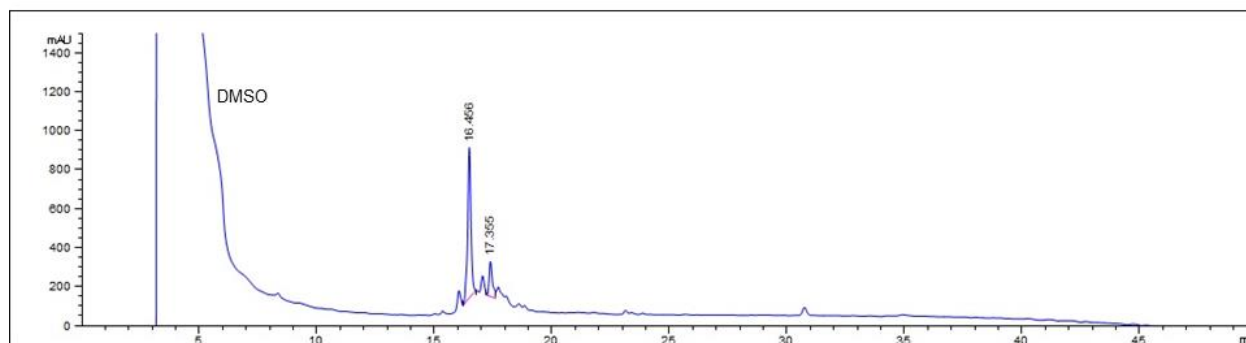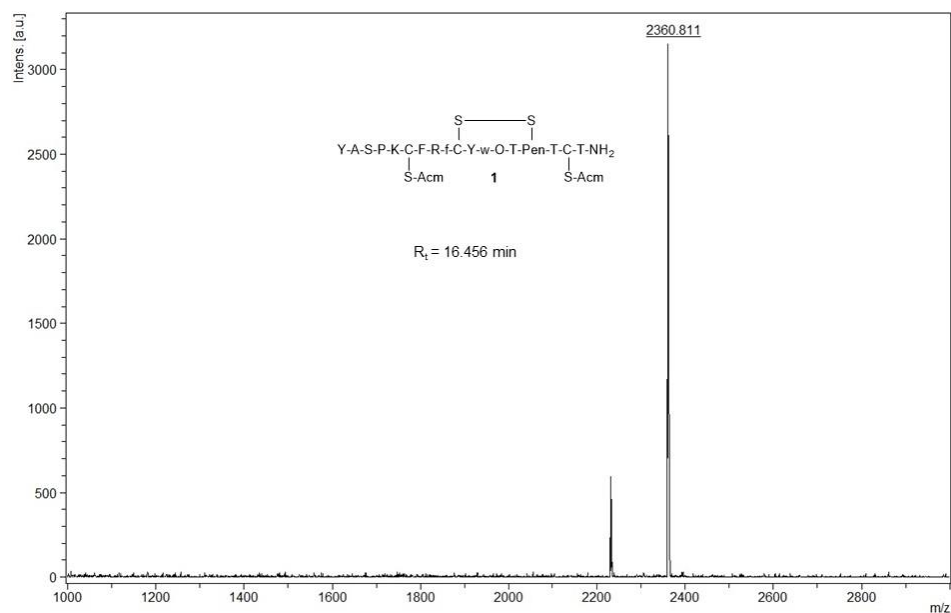

Expected [M+H]<sup>+</sup> = 2360.036 Da, observed [M+H]<sup>+</sup> = 2360.811 Da

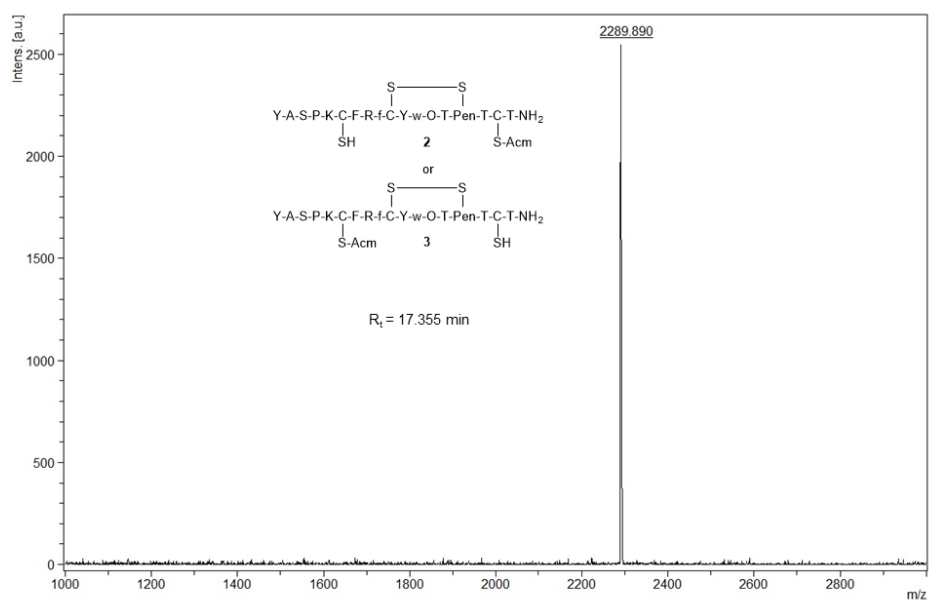

Expected  $[M+H]^+ = 2288.99 \text{ Da}$ , observed  $[M+H]^+ = 2289.89 \text{ Da}$

**Figure S1.** HPLC traces and MALDI ToF MS spectra of synthetic precursors following Cys<sup>10</sup> and Pen<sup>15</sup> oxidation.

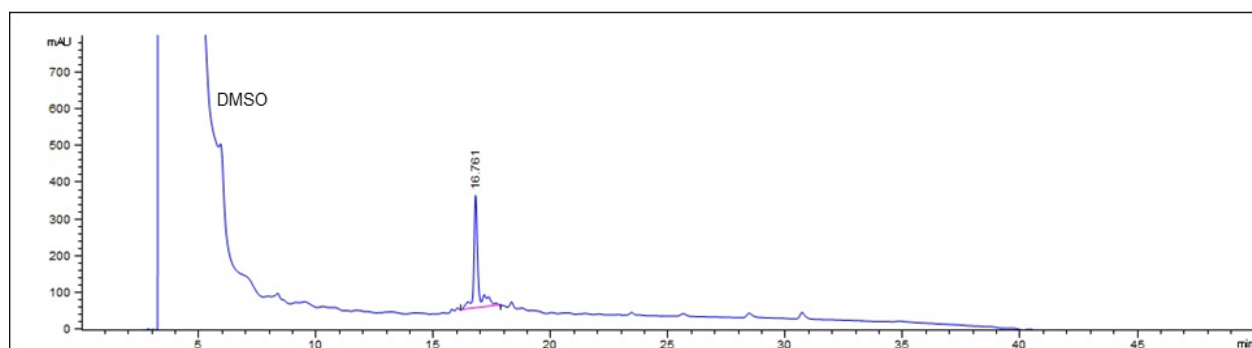

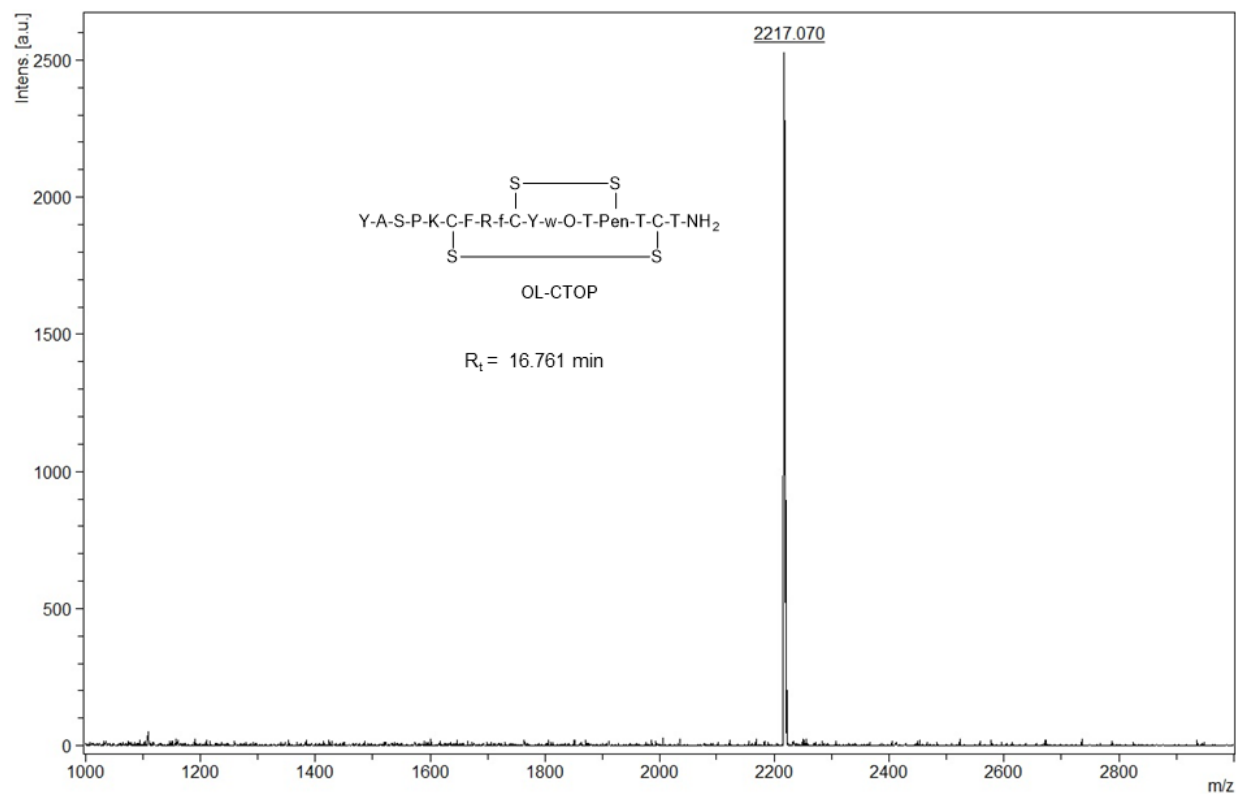

Expected [M+H]<sup>+</sup> = 2215.946 Da, observed [M+H]<sup>+</sup> = 2217.070 Da

**Figure S2.** HPLC traces and MALDI ToF MS spectra of synthetic precursors following Cys<sup>6</sup> and Cys<sup>17</sup> oxidation.

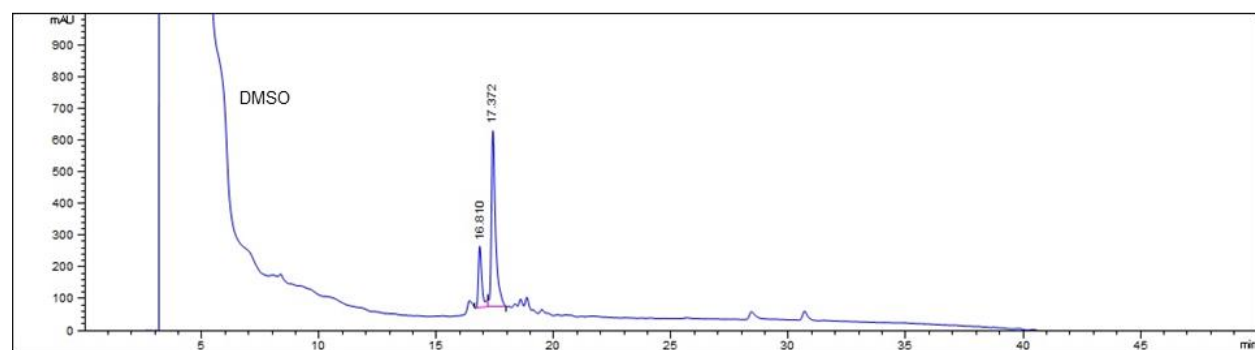

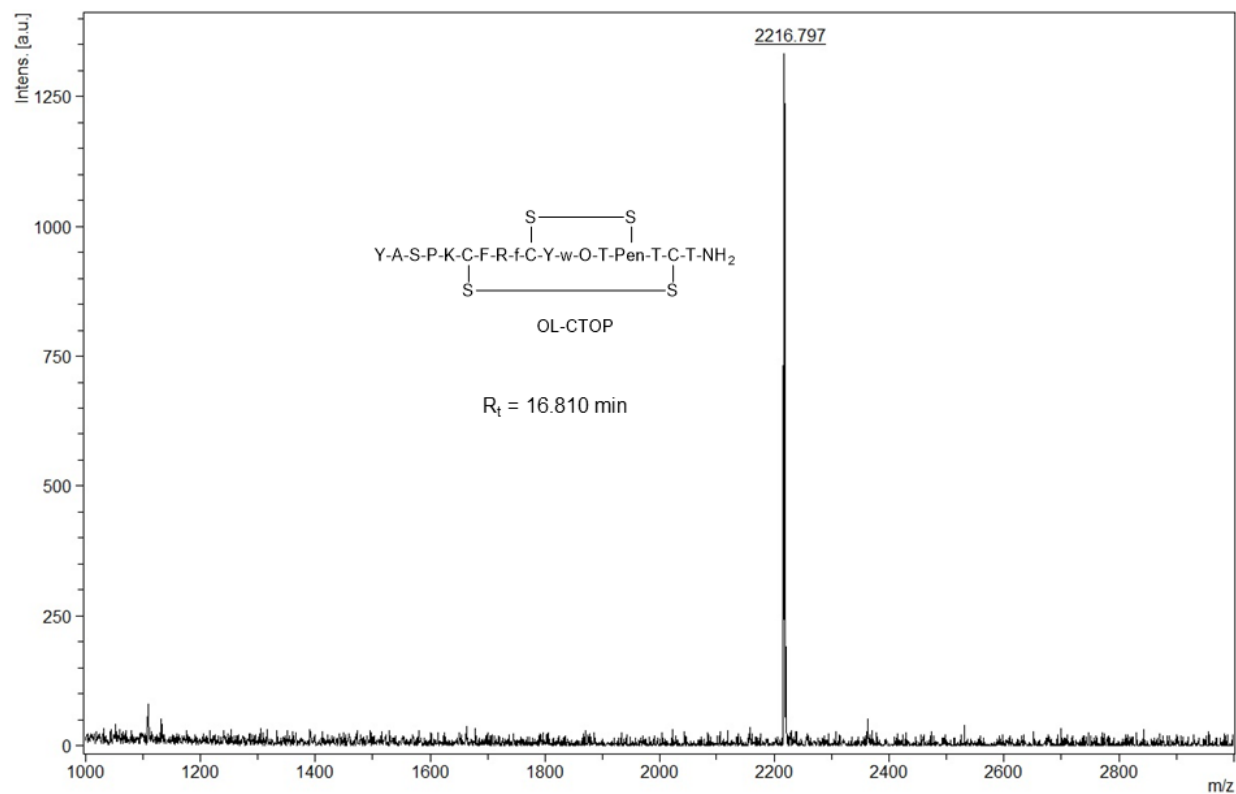

Expected  $[M+H]^+ = 2215.946$  Da, observed  $[M+H]^+ = 2216.797$  Da

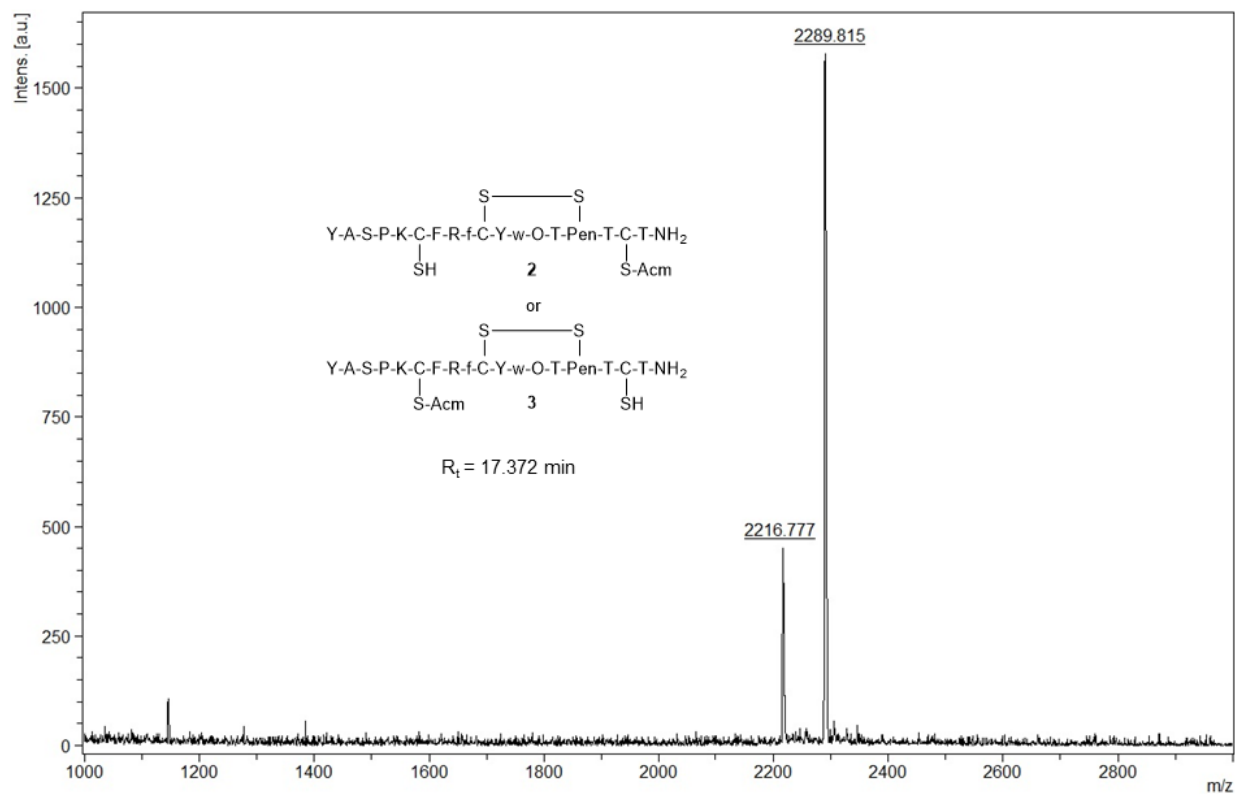

Expected [M+H]<sup>+</sup> = 2288.999 Da, observed [M+H]<sup>+</sup> = 2289.815 Da

**Figure S3.** HPLC traces and MALDI ToF MS spectra of OL-CTOP following single-step oxidation.

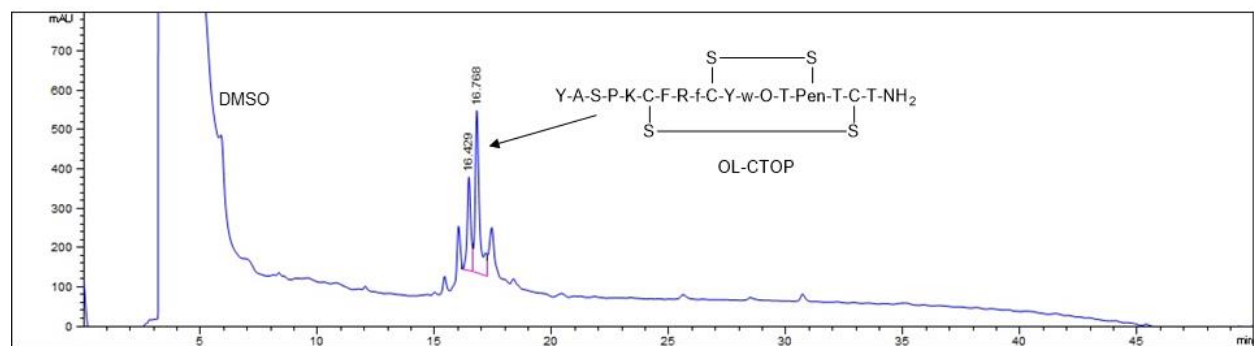

**Figure S4.** Representative HPLC trace of crude OL-CTOP following single-step oxidation with 30 eq of DMSO as a co-solvent.

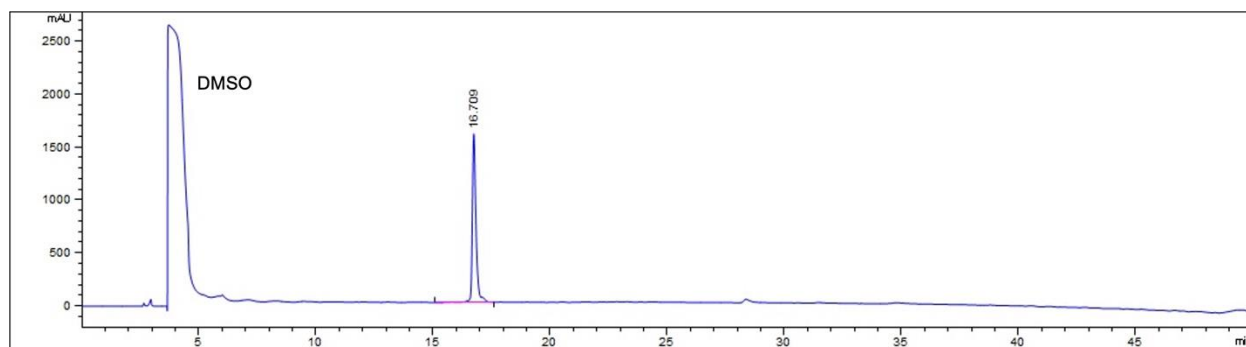

**Figure S5.** HPLC trace of OL-CTOP following trypsin digestion, 0 min time interval.

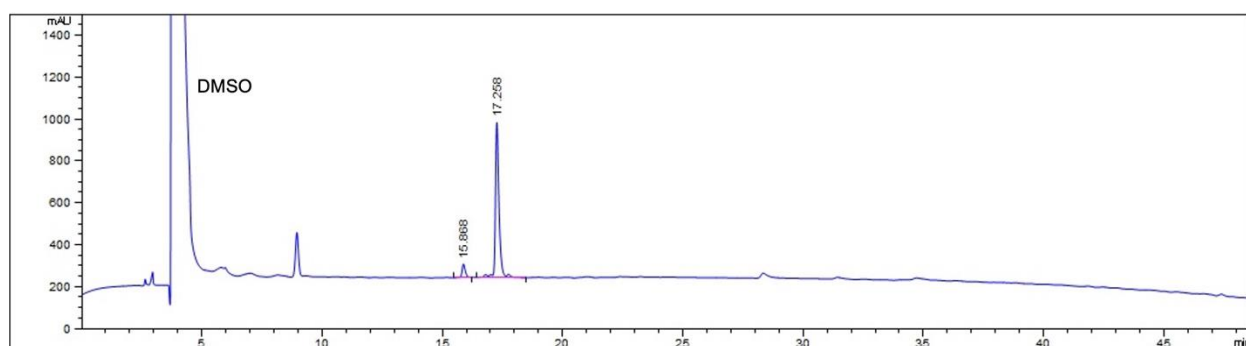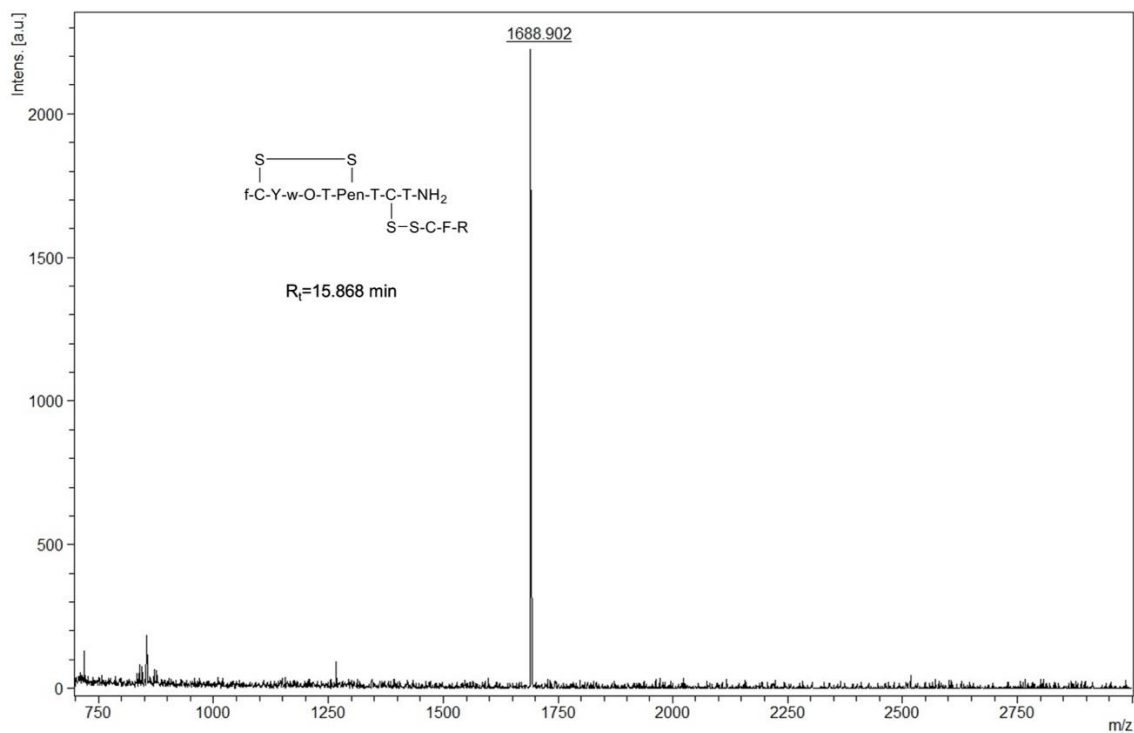

Expected  $[M+H]^+ = 1687.68 \text{ Da}$ , observed  $[M+H]^+ = 1688.902 \text{ Da}$

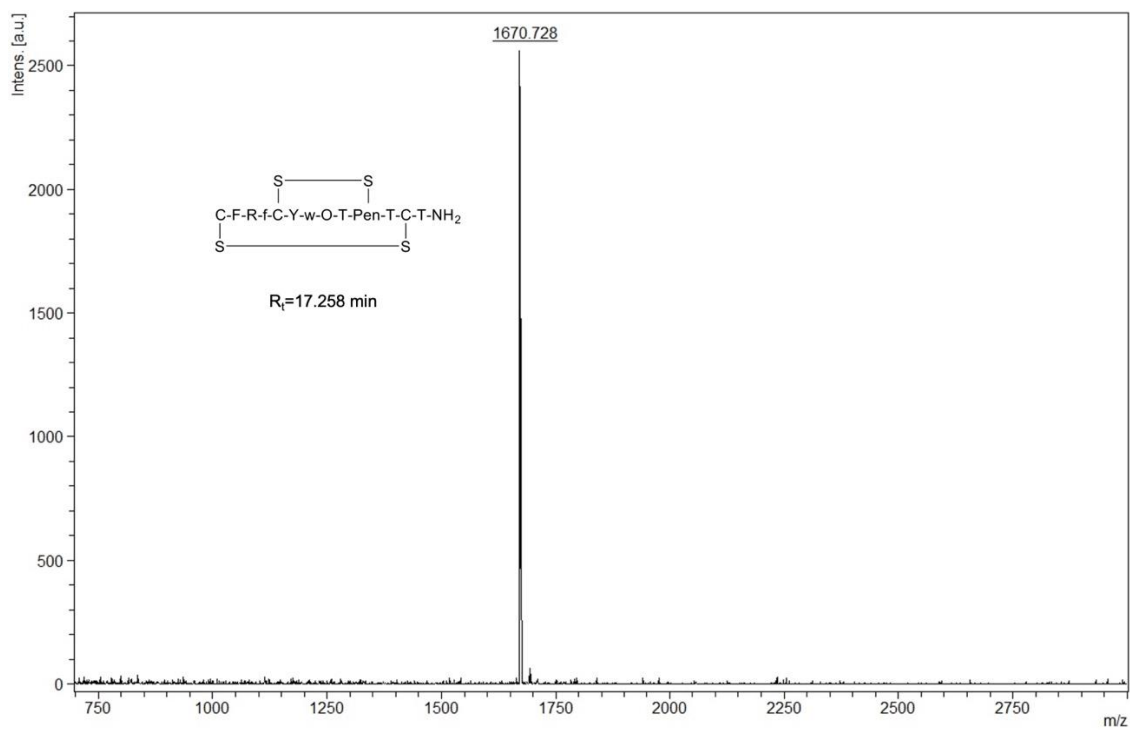

Expected  $[M+H]^+ = 1671.01$  Da, observed  $[M+H]^+ = 1670.728$  Da

**Figure S6.** HPLC trace and MALDI ToF MS spectra of OL-CTOP following trypsin digestion, 10 min time interval.

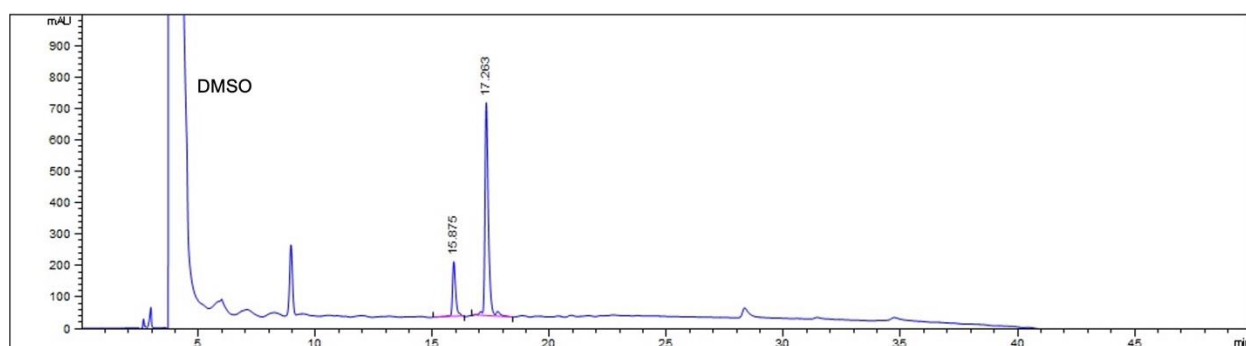



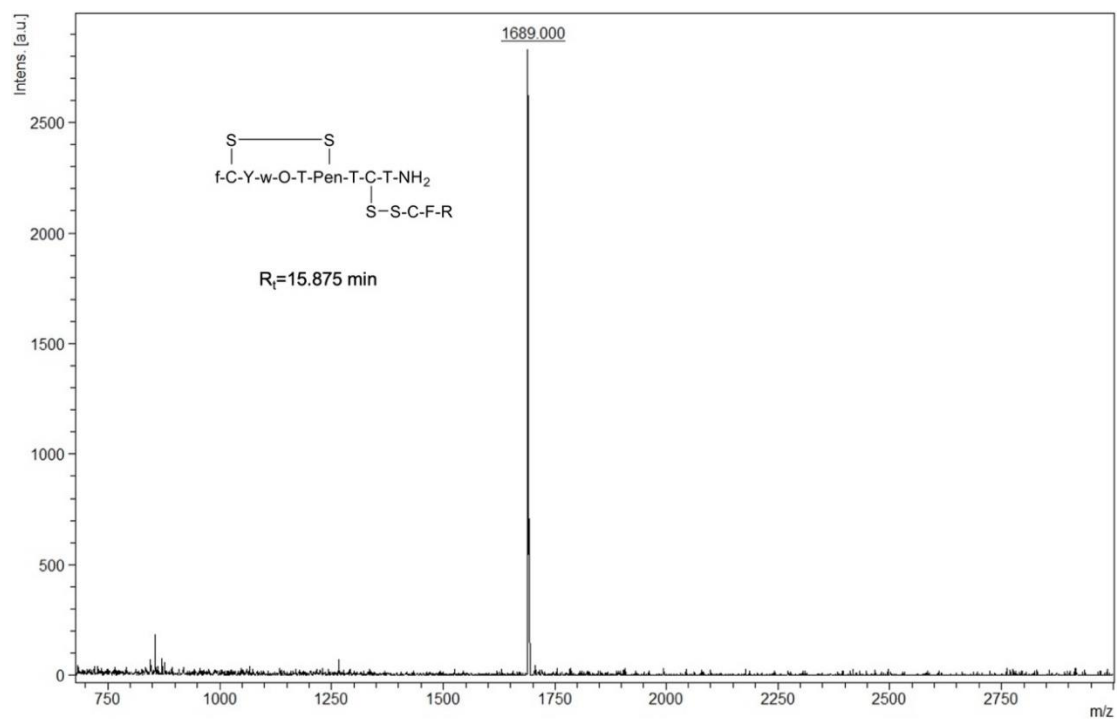

Expected  $[M+H]^+ = 1687.68$  Da, observed  $[M+H]^+ = 1689.000$  Da

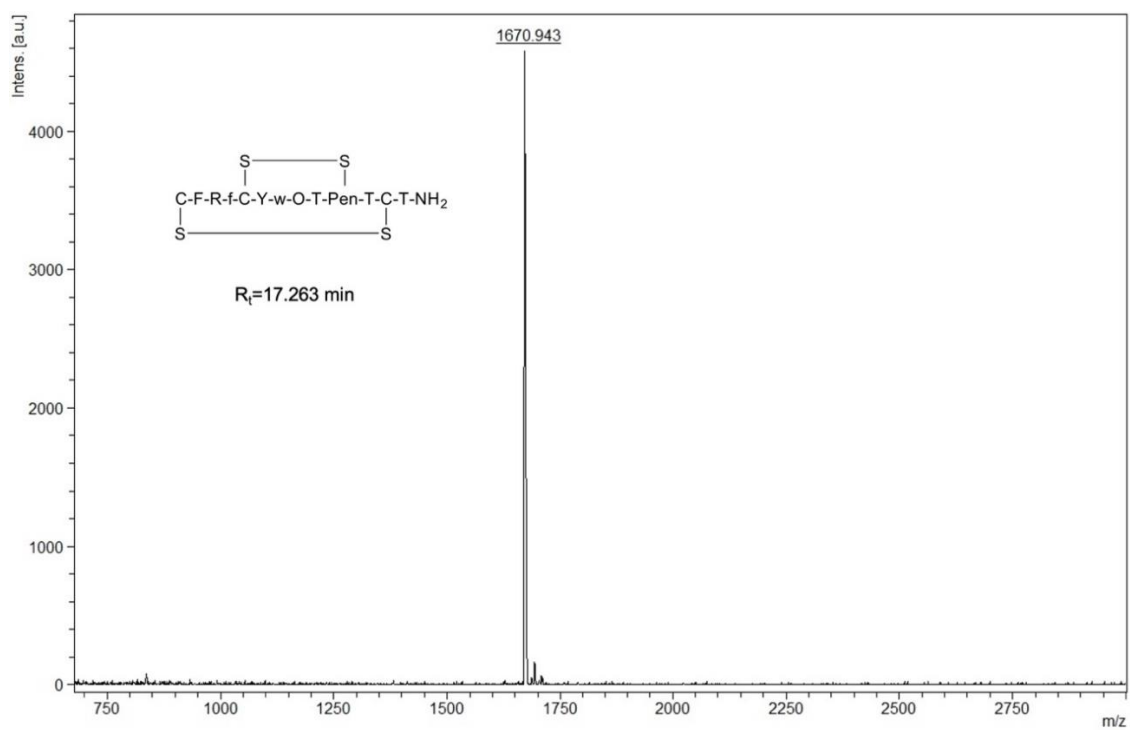

Expected  $[M+H]^+ = 1671.01$  Da, observed  $[M+H]^+ = 1670.943$  Da

**Figure S7.** HPLC trace and MALDI ToF MS spectra of OL-CTOP following trypsin digestion, 1h time interval.

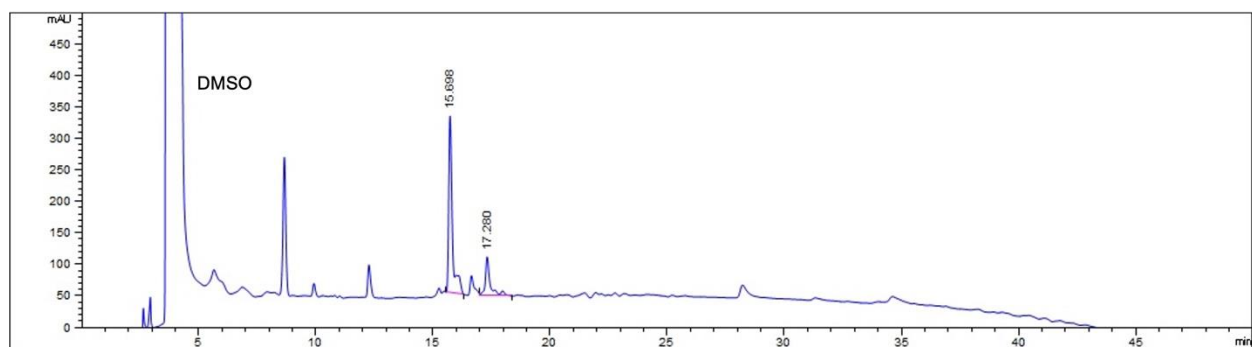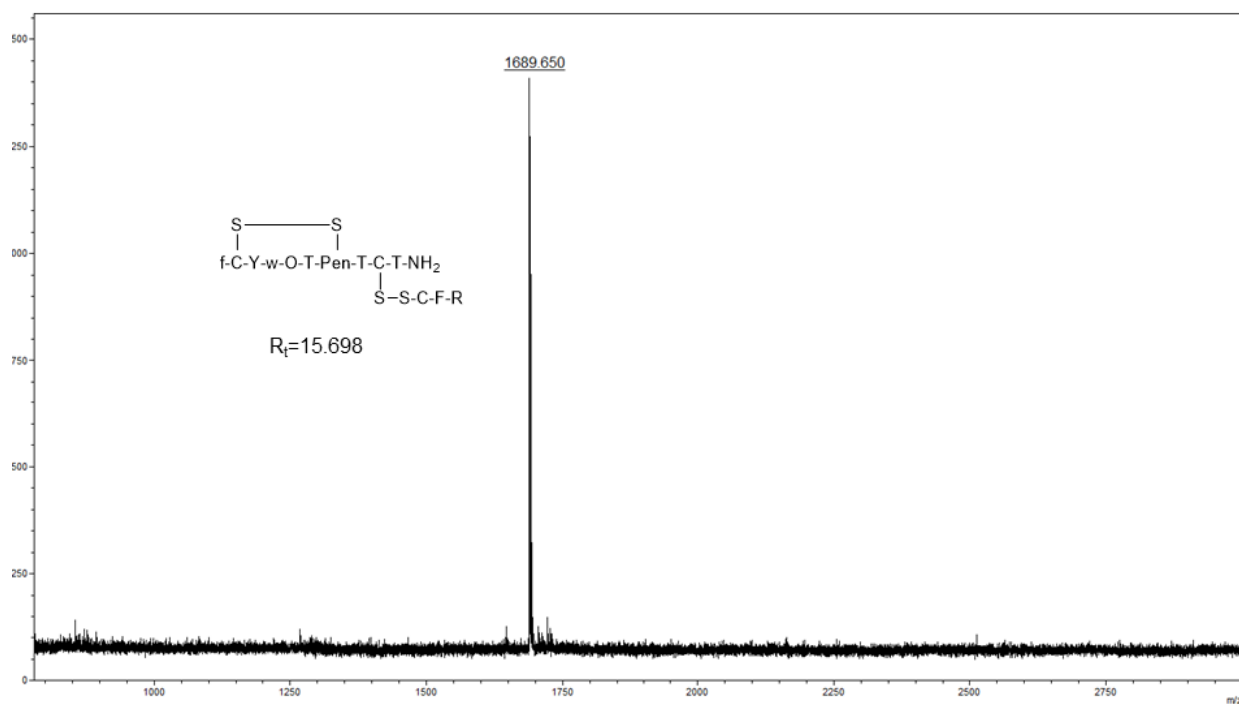

Expected  $[M+H]^+ = 1687.68$  Da, observed  $[M+H]^+ = 1689.650$  Da

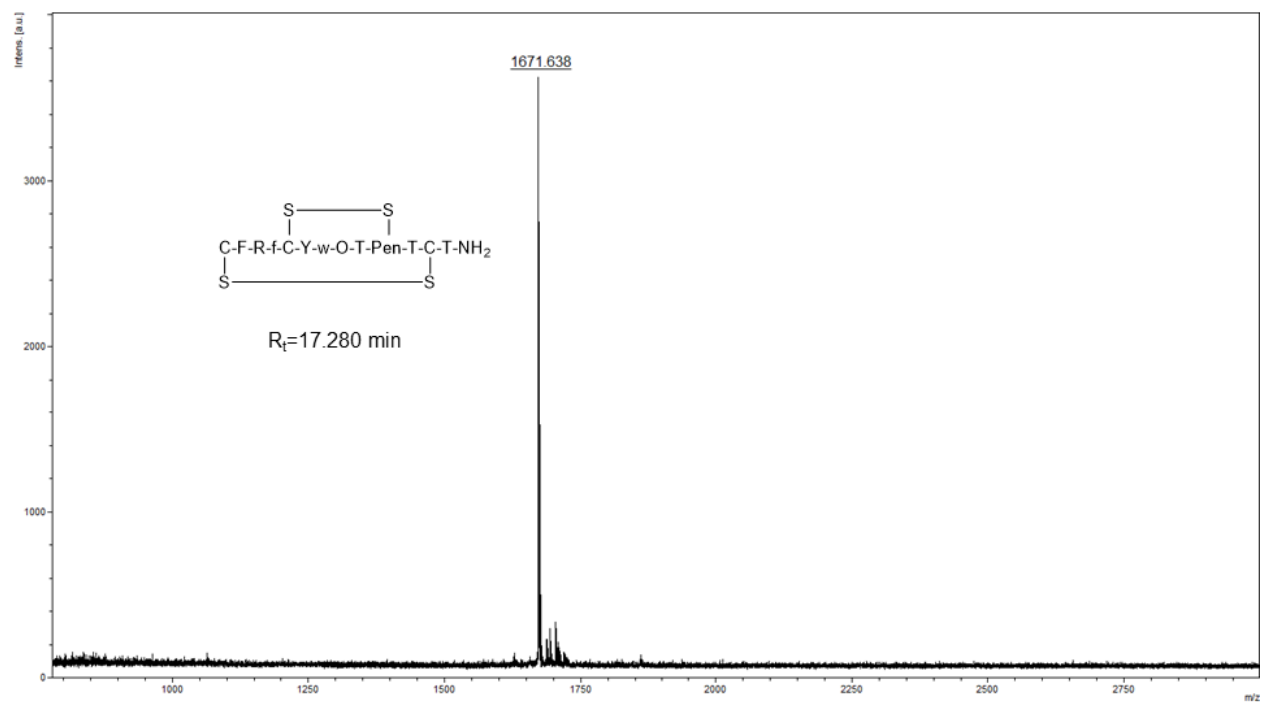

Expected  $[M+H]^+ = 1669.67$  Da, observed  $[M+H]^+ = 1671.638$  Da

**Figure S8.** HPLC trace and MALDI ToF MS spectra of OL-CTOP following trypsin digestion, 24h time interval.
